# Supplementary material
Source: PubMed Central journal article supplement (PMC9133221)

Current Biology, Volume 32

## Supplemental Information

**Determining protein polarization proteome-wide**

**using physical dissection of individual**

***Stentor coeruleus* cells**

**Athena Lin, Paul D. Piehowski, Chia-Feng Tsai, Tatyana Makushok, Lian Yi, Ulises Diaz, Connie Yan, Diana Summers, Pranidhi Sood, Richard D. Smith, Tao Liu, and Wallace F. Marshall**

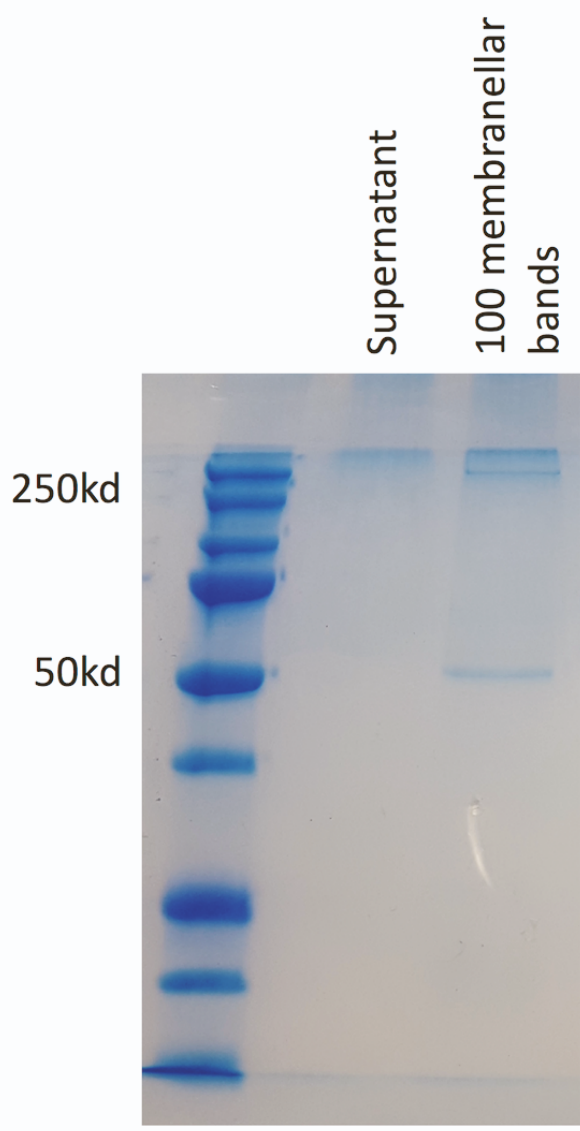

Colloidal Blue

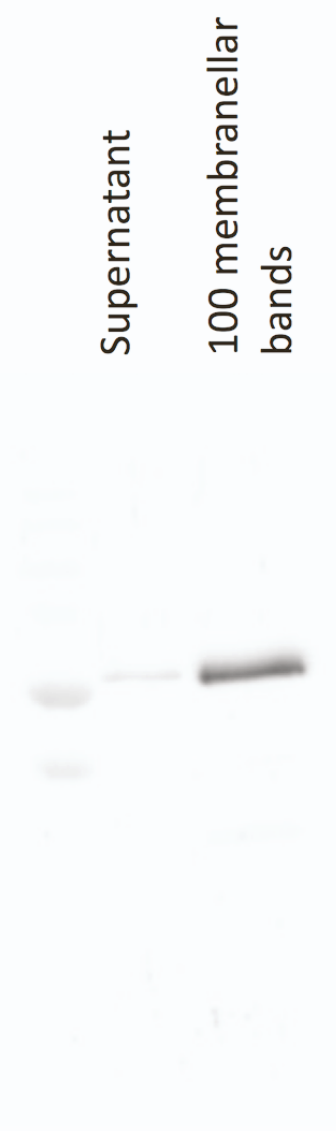

Western Blot  
Anti Beta Tubulin

**Figure S1. Identifying most abundant proteins in MB fraction. Related to Figure 1.** isolated MB along with supernatant obtained during the MB collection. (B) Western blot for tubulin confirming the identity of the 55 kDa band. This figure relates to main text Figure 1 by providing additional validation of the proteomic analysis reported in that figure.

A

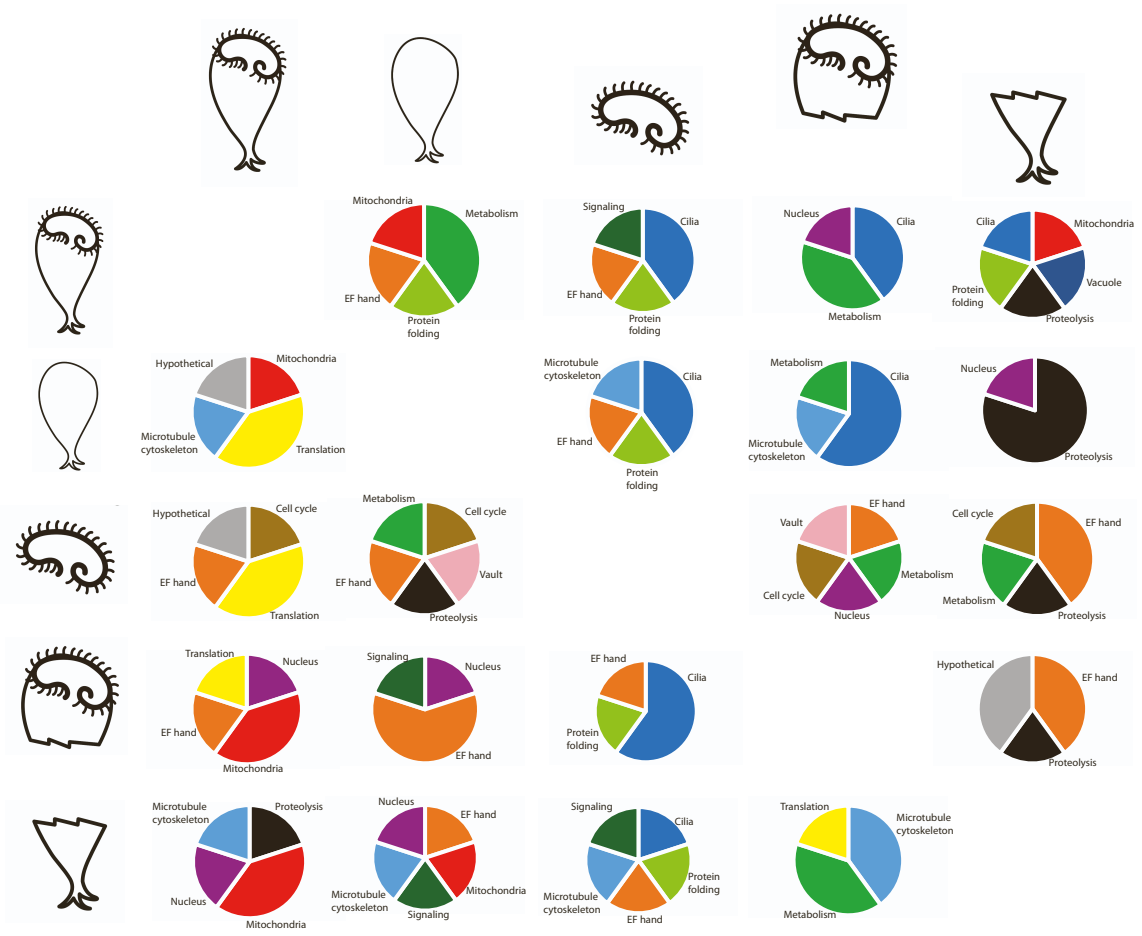

**Figure S2. Pairwise comparison between samples. Related to Figure 2.** Each pie chart represents the proteins most enriched in each *Stentor* sample compared to each other sample, regardless of total quantity. Color scheme is the same as in Figure 2C. This figure relates to main text Figure 2 by providing an alternative analysis of differences between cell fractions.

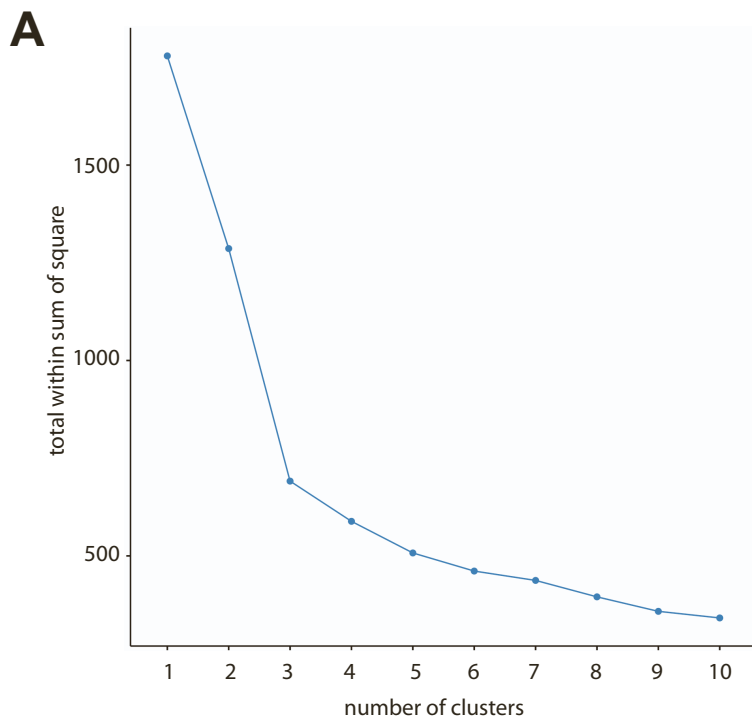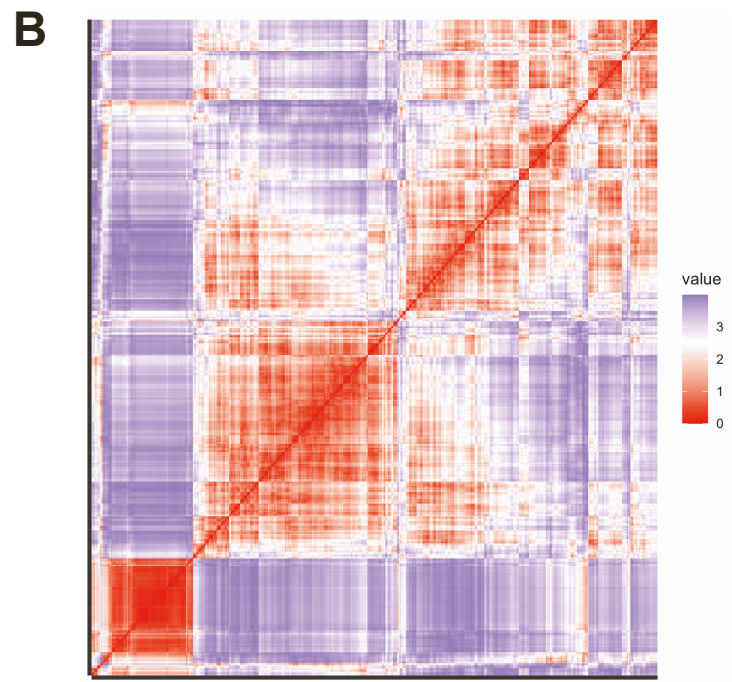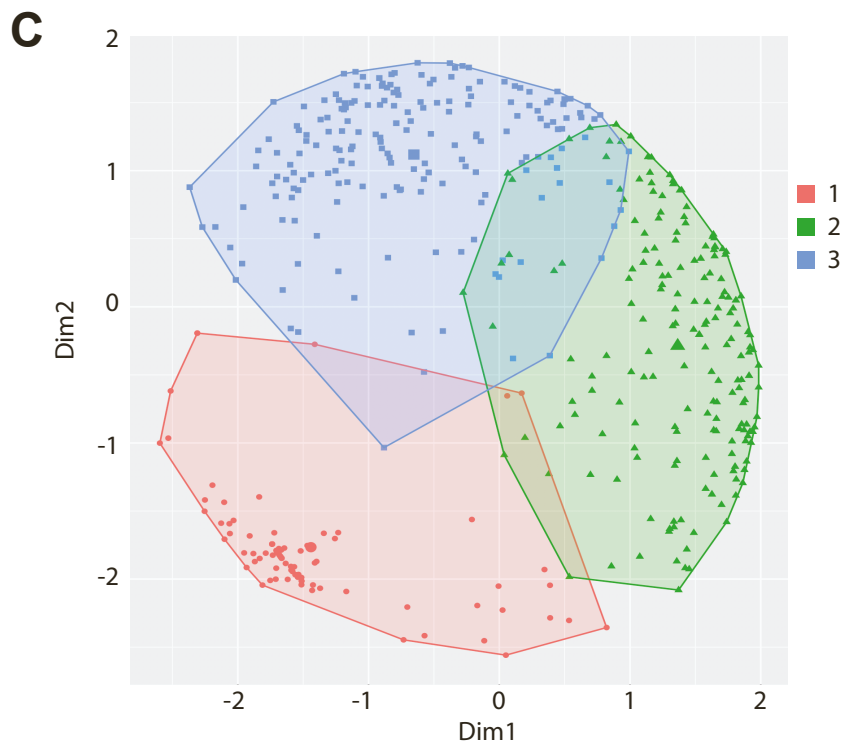

**Figure S3. Clustering of proteomic data. Related to Figure 4.** (A) Nbclust plot showing clear inflection clusters. (B) Distance map showing three blocks of correlation. (C) Cluster diagram from same assignment as used to produce the heatmap in Figure 4A, indicating that cluster 1 is well separated from clusters 2 and 3. This figure relates to Figure 4 by providing evidence to support the use of three clusters in generating the heatmap in Figure 4A.

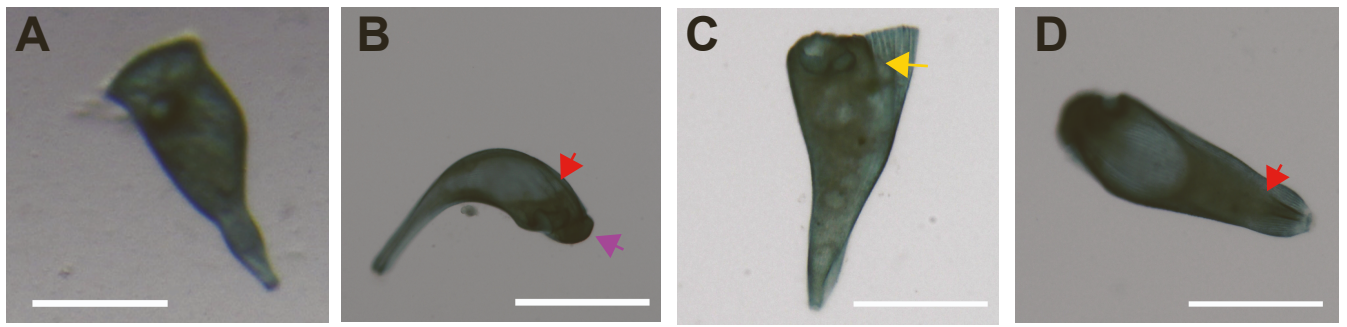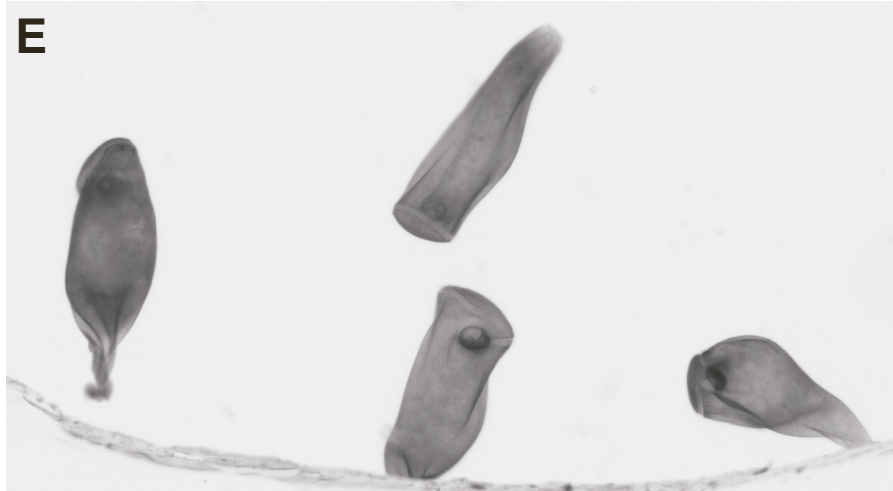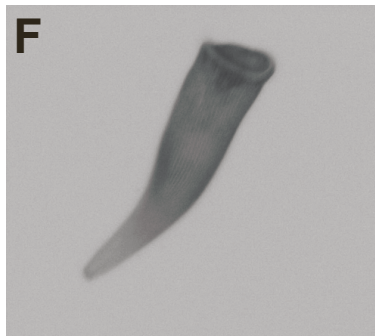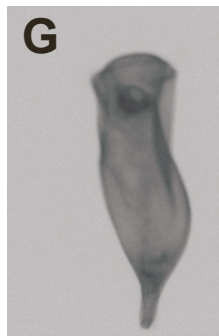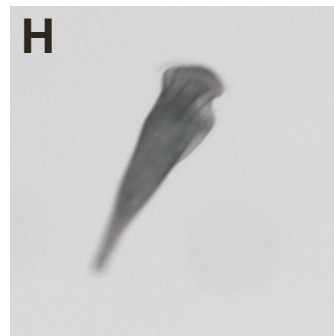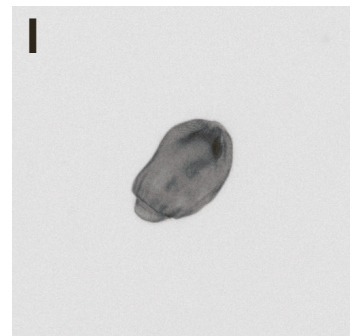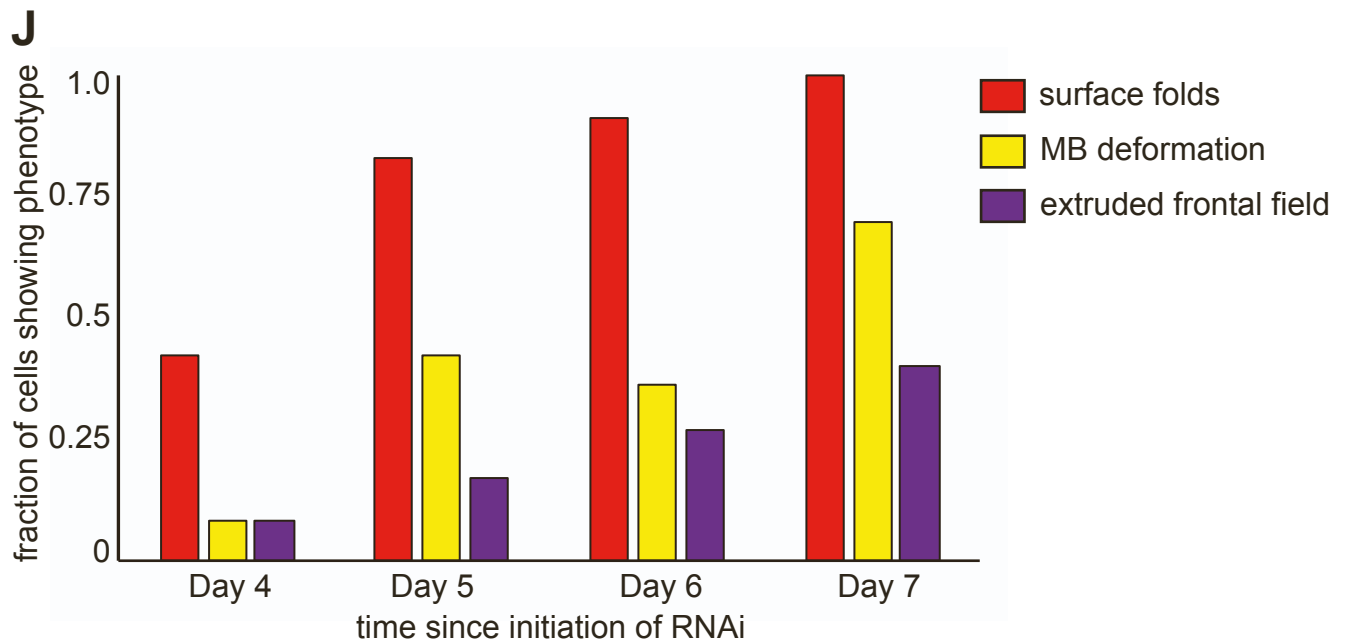



**Figure S4. Calyculin A treatment recapitulates phenotype of PP2a RNAi. Related to Figure 4(A)** Untreated cell showing normal morphology. (B-D) Calyculin A treated cell showing surface folds (red arrow), protruding frontal field (purple arrow), and membranellar bands that fail to close into a ring (yellow arrow) comparable to phenotypes seen with PP2a RNAi in Figure 4. (E) cells treated phenotype. (F) cell at day 4 of treatment showing normal-looking morphology. (G) cell at day 4 showing surface folds. (H) cell at day 5 showing surface folds combined with deformed MB. (I) cell at day 6 showing surface folds and extruded frontal field. (J) Proportion of cells showing each phenotype as RNAi progresses. This figure relates to Figure 4 by providing additional information about the possible function of PP2a.

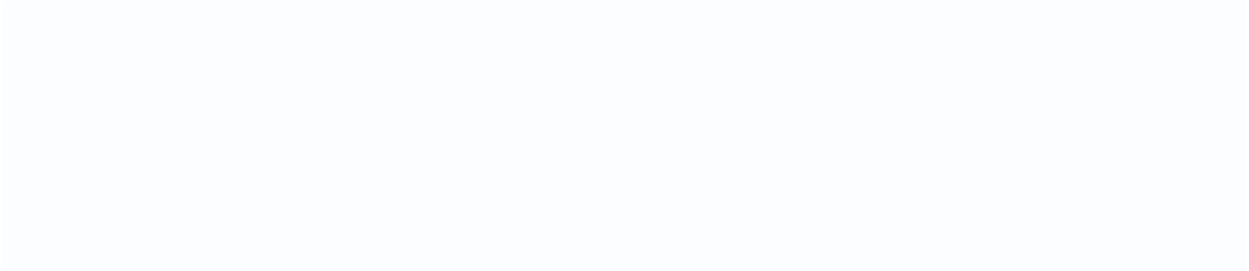

Supplement: NIHMS1800575-supplement-SI_Figures.pdf [file NIHMS1800575-supplement-SI_Figures.pdf]
