# Supplementary material
Source: PubMed Central journal article supplement (PMC9133221)
Supplement: NIHMS1800575-supplement-Supporting_Info.pdf [file NIHMS1800575-supplement-Supporting_Info.pdf]

## R code used to generate proteomic dissection profiles

```
# function to compute Dissection Profile
# modified 11/23/2020 to use chi squared instead of correlation to compare protein abundance
columns
# given three lists of protein abundances from mass spec from three samples
# A, B, and C, we scan through a range of proportions p that describe how
# the first two samples are mixed to give the third sample
# by calculating  $\text{cov}(pA + (1-p)B, C)$  and finding the p that maximizes the covariance
# this is a measure for the relative proportion of cell fragments A and B in the
# combined sample C (which could be a whole cell for example)

# format for the input is a dataframe where the first column will be gene access numbers
# and the other columns will be abundances in various fractions
# the three inputs A B and C will be column numbers
# p will vary from 0 to 1 in 101 increments so 0, 0.01, 0.02, etc.

# the variable holding the data frame is called proteome_data
# proteome_data <- read.table("abundance_data_for_profile.csv", sep=";", header=TRUE)

data_table <- proteome_data5

A <- 4 # fragment A (MB-less body) fraction whose contribution is weighted by p
B <- 2 # fragment B (MB) fraction whose contribution is weighted by (1-p)
C <- 3 # whole cell

results = c() # setting up the array to hold the values of p

for (pindex in 0:100)
{
  p <- 0.01*pindex
  fragment_sum <- p*data_table[,A] + (1-p)*data_table[,B]
  Xsq <- chisq.test(round(fragment_sum), data_table[,C], simulate.p.value=TRUE)
  match_score <- as.numeric(Xsq$statistic) # have to converted a named number to a number
  results <- c(results, match_score)
}

best_correlation <- min(results)
print(best_correlation)
best_p <- which.min(results)
print(best_p - 1) #correct for offset
```
